# Supplementary material
Source: ML conference proceedings conference paper supplement (https://openreview.net/forum?id=oprTuM8F3dt)
Supplement: supplementary_material [file attachment]

# Coordinates are not lonely - Codebook Prior Helps Implicit Neural 3D Representations

## Supplementary Materials

Anonymous Author(s)

Affiliation

Address

email

### 1 Novel View Synthesis Videos

We visualize some of our experiments in a video, including sparse views and few views setting on the DTU [1], BlendedMVS [5] and H3DS [4] dataset (see CoCo-INR\_Sparse\_Views\_Setting.mp4 and CoCo-INR\_Few\_Views\_Setting.mp4). Specifically, two opposite views (i.e., front and behind) are selected as the start and end view, then an arc-shaped sequence of novel views with even adjacent view degree interval are then synthesized between the start and end views, constituting a total number of 60 views covering 180 degrees variation. Note that the DTU dataset is not selected from 360-degree surrounding views so it is not suitable for the above view generation method. For DTU dataset, we chose the leftmost and rightmost views to generate a arc-shaped view sequence between them and use masks to reduce the background ambiguity caused by the non-surround setting.

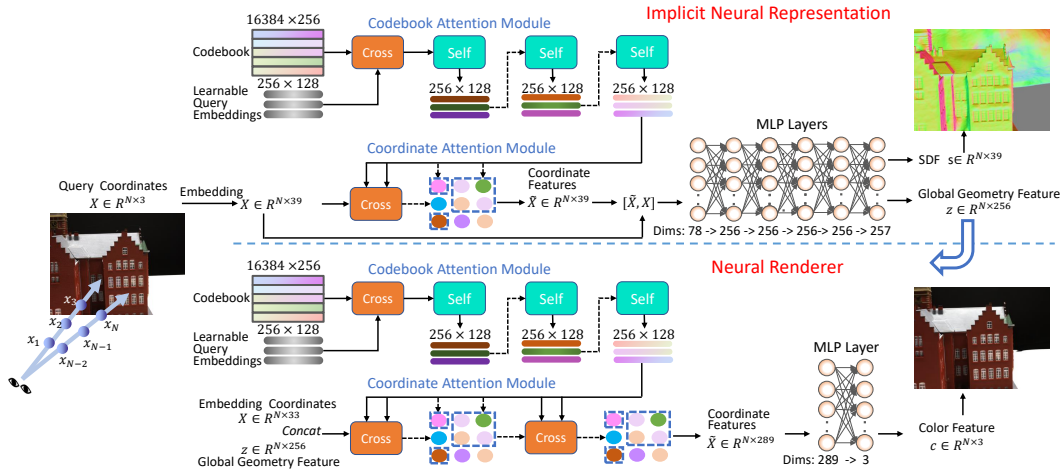

Figure 1: Pipeline of our method.

### 2 Details of Our CoCo-INR

We now present the pipeline and details of our proposed CoCo-INR. As shown in Fig. 1, it contains two modules: implicit neural representation and neural renderer, each of which consists of several codebook attention and coordinate attention modules and MLP layers. The structure of the codebook

attention and coordinate attention module has been described in our paper. Here is the workflow of our method.

### 3 Additional Experiments

In our paper, we have comprehensively evaluated the performance of our method and other state-of-the-art methods on DTU [1], BlendedMVS [5], and H3DS [4] datasets under different numbers of training views. In this section, we will present detailed data for qualitative comparisons, challenge fewer training views, and analyze limitations.

#### 3.1 Detailed Quantitative Results

Qualitative comparisons with NeRF [2], UNISURF [3], and VolSDF [6] have been shown in paper. Our CoCo-based method outperforms others in terms of PSNR, SSIM, and LPIPS whether sparse views or few views are available. This section further presents the evaluation results for each scan on DTU [1], BlendedMVS [5], and H3DS [4] datasets.

**For sparse views setting (16-32 in total)**, Table 1 shows the comparison of each scan on the DTU dataset, and Table 2 shows the comparison of each scan on the BlendedMVS dataset, and Table 3 shows the comparison of each scan on the H3DS dataset. It can be seen that our method outperforms other methods in most scans, which means that our method has good performance and robustness under sparse views.

Table 1: The results of different methods on the DTU dataset for each scan with sparse views (16-32) and without object masks.  $\uparrow$  means the higher, the better.

| Scan        | PSNR $\uparrow$ |         |               |               | SSIM $\uparrow$ |         |              |              | LPIPS $\downarrow$ |         |              |              |
|-------------|-----------------|---------|---------------|---------------|-----------------|---------|--------------|--------------|--------------------|---------|--------------|--------------|
|             | NeRF            | UNISURF | VolSDF        | Ours          | NeRF            | UNISURF | VolSDF       | Ours         | NeRF               | UNISURF | VolSDF       | Ours         |
| 24          | 10.720          | 20.060  | 23.100        | <b>23.896</b> | 0.478           | 0.704   | 0.676        | <b>0.791</b> | 0.377              | 0.277   | 0.246        | <b>0.227</b> |
| 37          | 19.789          | 20.065  | <b>22.576</b> | 22.022        | 0.628           | 0.650   | 0.607        | <b>0.703</b> | <b>0.227</b>       | 0.277   | 0.254        | 0.230        |
| 40          | 9.424           | 12.185  | 21.705        | <b>22.803</b> | 0.364           | 0.512   | <b>0.593</b> | 0.569        | 0.338              | 0.313   | 0.234        | <b>0.231</b> |
| 55          | 20.323          | 22.264  | <b>24.364</b> | 23.804        | 0.734           | 0.783   | <b>0.835</b> | 0.821        | 0.329              | 0.379   | 0.333        | <b>0.318</b> |
| 63          | 24.492          | 24.539  | 25.378        | <b>26.568</b> | <b>0.826</b>    | 0.811   | 0.699        | 0.705        | <b>0.184</b>       | 0.229   | 0.233        | 0.200        |
| 65          | 18.161          | 23.859  | <b>27.904</b> | 26.121        | 0.780           | 0.837   | <b>0.870</b> | 0.850        | <b>0.262</b>       | 0.310   | 0.271        | 0.282        |
| 69          | 23.478          | 24.427  | 25.434        | <b>25.935</b> | 0.867           | 0.882   | 0.910        | <b>0.915</b> | 0.302              | 0.339   | <b>0.274</b> | 0.283        |
| 83          | 25.733          | 25.808  | 26.165        | <b>27.975</b> | 0.922           | 0.905   | 0.925        | <b>0.944</b> | <b>0.270</b>       | 0.370   | 0.360        | 0.391        |
| 97          | 22.119          | 21.833  | 23.765        | <b>24.029</b> | 0.854           | 0.845   | 0.887        | <b>0.896</b> | <b>0.297</b>       | 0.392   | 0.308        | 0.339        |
| 105         | 24.746          | 24.240  | 27.257        | <b>27.577</b> | 0.895           | 0.888   | <b>0.926</b> | 0.924        | <b>0.268</b>       | 0.372   | 0.363        | 0.300        |
| 106         | 27.629          | 26.919  | 30.394        | <b>30.813</b> | 0.904           | 0.907   | 0.932        | <b>0.940</b> | 0.381              | 0.389   | 0.345        | <b>0.338</b> |
| 110         | 25.353          | 26.046  | 28.084        | <b>30.190</b> | 0.916           | 0.910   | 0.924        | <b>0.939</b> | <b>0.369</b>       | 0.426   | 0.392        | <b>0.369</b> |
| 114         | 24.297          | 24.394  | 28.039        | <b>28.707</b> | 0.863           | 0.875   | <b>0.907</b> | 0.902        | 0.348              | 0.387   | 0.340        | <b>0.338</b> |
| 118         | 29.082          | 28.484  | <b>32.218</b> | 31.358        | 0.919           | 0.921   | <b>0.948</b> | 0.943        | <b>0.312</b>       | 0.377   | 0.341        | 0.329        |
| 122         | 27.091          | 28.125  | <b>32.765</b> | 29.270        | 0.901           | 0.921   | <b>0.952</b> | 0.942        | 0.334              | 0.387   | 0.350        | <b>0.294</b> |
| <b>Mean</b> | 22.162          | 23.549  | 26.609        | <b>26.738</b> | 0.790           | 0.823   | 0.839        | <b>0.852</b> | 0.306              | 0.348   | 0.309        | <b>0.298</b> |

**For few views setting (5-8 in total)**, Table 4 shows the comparison of each scan on the DTU dataset, and Table 5 shows the comparison of each scan on the BlendedMVS dataset, and Table 6 shows the comparison of each scan on the H3DS dataset. VolSDF [6] achieves better performance than other state-of-the-art methods in the sparse views setting, so we only compare with VolSDF in this more difficult setting. It can be seen that in each scan, using fewer training views will inevitably lead to performance degradation compared with sparse views, but our method still maintains better robustness and performance for the majority of scans.

Table 2: The results of different methods on the BlendedMVS dataset for each scan with sparse views (16-32) and without object masks.  $\uparrow$  means the higher, the better.

| Scan        | PSNR $\uparrow$ |         |        |               | SSIM $\uparrow$ |         |              |              | LPIPS $\downarrow$ |         |        |              |
|-------------|-----------------|---------|--------|---------------|-----------------|---------|--------------|--------------|--------------------|---------|--------|--------------|
|             | NeRF            | UNISURF | VolSDF | Ours          | NeRF            | UNISURF | VolSDF       | Ours         | NeRF               | UNISURF | VolSDF | Ours         |
| 1           | 19.179          | 15.586  | 20.004 | <b>20.038</b> | 0.675           | 0.626   | <b>0.725</b> | <b>0.725</b> | 0.256              | 0.295   | 0.215  | <b>0.211</b> |
| 2           | 14.220          | 14.848  | 19.297 | <b>20.951</b> | 0.630           | 0.651   | 0.757        | <b>0.810</b> | 0.320              | 0.351   | 0.234  | <b>0.203</b> |
| 3           | 16.684          | 14.717  | 16.808 | <b>17.263</b> | 0.647           | 0.600   | 0.671        | <b>0.682</b> | 0.293              | 0.336   | 0.268  | <b>0.265</b> |
| 4           | <b>23.684</b>   | 15.200  | 23.214 | 23.007        | 0.838           | 0.755   | 0.847        | <b>0.854</b> | 0.170              | 0.258   | 0.154  | <b>0.148</b> |
| 5           | 17.160          | 14.361  | 16.744 | <b>17.528</b> | 0.745           | 0.700   | 0.758        | <b>0.784</b> | 0.244              | 0.304   | 0.215  | <b>0.207</b> |
| 6           | 15.575          | 13.739  | 19.775 | <b>21.741</b> | 0.670           | 0.630   | 0.788        | <b>0.819</b> | 0.282              | 0.304   | 0.175  | <b>0.148</b> |
| 7           | 8.722           | 12.086  | 17.972 | <b>17.997</b> | 0.528           | 0.610   | <b>0.721</b> | <b>0.721</b> | 0.349              | 0.333   | 0.237  | <b>0.223</b> |
| 8           | 17.851          | 17.187  | 18.924 | <b>19.827</b> | 0.743           | 0.737   | 0.821        | <b>0.837</b> | 0.183              | 0.171   | 0.140  | <b>0.128</b> |
| 9           | 15.634          | 15.019  | 17.747 | <b>17.997</b> | 0.535           | 0.540   | 0.639        | <b>0.640</b> | 0.356              | 0.346   | 0.284  | <b>0.279</b> |
| <b>Mean</b> | 16.523          | 14.749  | 18.942 | <b>19.594</b> | 0.667           | 0.649   | 0.747        | <b>0.764</b> | 0.272              | 0.299   | 0.213  | <b>0.201</b> |

Table 3: The results of different methods on the H3DS dataset for each scan with sparse views (16-32) and without object masks.  $\uparrow$  means the higher, the better.

| Scan        | PSNR $\uparrow$ |         |        |               | SSIM $\uparrow$ |         |              |              | LPIPS $\downarrow$ |         |              |              |
|-------------|-----------------|---------|--------|---------------|-----------------|---------|--------------|--------------|--------------------|---------|--------------|--------------|
|             | NeRF            | UNISURF | VolSDF | Ours          | NeRF            | UNISURF | VolSDF       | Ours         | NeRF               | UNISURF | VolSDF       | Ours         |
| *a287       | 21.826          | 14.314  | 25.283 | <b>26.070</b> | 0.896           | 0.801   | <b>0.941</b> | <b>0.941</b> | 0.121              | 0.198   | 0.082        | <b>0.076</b> |
| *42a8       | 19.783          | 20.170  | 22.437 | <b>23.785</b> | 0.825           | 0.832   | 0.863        | <b>0.887</b> | 0.179              | 0.202   | 0.138        | <b>0.121</b> |
| *1d54       | 23.779          | 18.028  | 25.420 | <b>25.933</b> | 0.878           | 0.810   | 0.893        | <b>0.904</b> | 0.130              | 0.184   | 0.114        | <b>0.107</b> |
| *0854       | 20.302          | 20.236  | 22.819 | <b>24.274</b> | 0.840           | 0.835   | 0.865        | <b>0.875</b> | 0.151              | 0.151   | 0.127        | <b>0.124</b> |
| *0c89       | 22.241          | 21.371  | 23.658 | <b>25.116</b> | 0.911           | 0.898   | 0.932        | <b>0.942</b> | 0.117              | 0.122   | 0.087        | <b>0.084</b> |
| *0226       | 22.207          | 12.104  | 25.582 | <b>25.742</b> | 0.861           | 0.762   | <b>0.907</b> | <b>0.907</b> | 0.130              | 0.246   | <b>0.088</b> | <b>0.088</b> |
| *4baa       | 21.458          | 15.378  | 24.949 | <b>26.755</b> | 0.884           | 0.820   | 0.909        | <b>0.931</b> | 0.139              | 0.187   | 0.106        | <b>0.094</b> |
| *512f       | 21.009          | 20.250  | 24.217 | <b>25.141</b> | 0.830           | 0.826   | 0.878        | <b>0.895</b> | 0.183              | 0.223   | 0.141        | <b>0.127</b> |
| *3924       | 21.108          | 18.979  | 23.774 | <b>26.090</b> | 0.865           | 0.832   | 0.897        | <b>0.918</b> | 0.133              | 0.201   | 0.112        | <b>0.091</b> |
| *e5bc       | 23.274          | 12.605  | 24.051 | <b>24.395</b> | 0.908           | 0.768   | 0.918        | <b>0.926</b> | 0.099              | 0.210   | 0.084        | <b>0.079</b> |
| *ee0b       | 21.128          | 12.636  | 22.629 | <b>24.136</b> | 0.886           | 0.763   | 0.911        | <b>0.921</b> | 0.131              | 0.217   | 0.100        | <b>0.091</b> |
| *e187       | 24.039          | 20.294  | 25.256 | <b>26.738</b> | 0.893           | 0.846   | 0.913        | <b>0.923</b> | 0.114              | 0.146   | 0.092        | <b>0.084</b> |
| *d436       | 19.579          | 18.488  | 21.114 | <b>21.356</b> | 0.817           | 0.799   | 0.847        | <b>0.851</b> | 0.168              | 0.237   | 0.160        | <b>0.136</b> |
| *b9c0       | 21.514          | 20.944  | 23.069 | <b>27.221</b> | 0.854           | 0.855   | 0.877        | <b>0.916</b> | 0.153              | 0.182   | 0.129        | <b>0.101</b> |
| *9c4e       | 21.905          | 17.540  | 25.714 | <b>27.557</b> | 0.911           | 0.881   | 0.943        | <b>0.950</b> | 0.110              | 0.144   | 0.080        | <b>0.073</b> |
| *7be3       | 20.288          | 14.227  | 20.190 | <b>22.983</b> | 0.835           | 0.787   | 0.843        | <b>0.866</b> | 0.138              | 0.198   | 0.138        | <b>0.106</b> |
| *fd85       | 22.270          | 9.058   | 24.448 | <b>25.250</b> | 0.873           | 0.658   | 0.900        | <b>0.910</b> | 0.140              | 0.296   | 0.114        | <b>0.102</b> |
| *c1e6       | 21.110          | 15.816  | 25.507 | <b>26.204</b> | 0.889           | 0.832   | 0.932        | <b>0.938</b> | 0.132              | 0.193   | 0.090        | <b>0.082</b> |
| *4b87       | 21.769          | 22.298  | 24.960 | <b>25.244</b> | 0.897           | 0.901   | 0.931        | <b>0.934</b> | 0.126              | 0.116   | 0.094        | <b>0.092</b> |
| *2a8f       | 11.296          | 15.006  | 24.133 | <b>25.439</b> | 0.697           | 0.821   | 0.928        | <b>0.931</b> | 0.285              | 0.180   | 0.094        | <b>0.093</b> |
| *244e       | 22.966          | 14.668  | 23.207 | <b>25.295</b> | 0.833           | 0.758   | 0.853        | <b>0.875</b> | 0.155              | 0.226   | 0.123        | <b>0.106</b> |
| *deb0       | 22.809          | 20.577  | 25.772 | <b>28.006</b> | 0.898           | 0.862   | 0.931        | <b>0.942</b> | 0.139              | 0.141   | 0.114        | <b>0.097</b> |
| *2091       | 19.607          | 18.199  | 22.038 | <b>22.685</b> | 0.839           | 0.838   | 0.864        | <b>0.871</b> | 0.159              | 0.176   | 0.134        | <b>0.122</b> |
| <b>Mean</b> | 21.185          | 17.095  | 23.922 | <b>25.279</b> | 0.861           | 0.816   | 0.898        | <b>0.911</b> | 0.144              | 0.190   | 0.110        | <b>0.098</b> |

Table 4: The results of different methods on the DTU dataset for each scan with few views (5-8) and without object masks.  $\uparrow$  means the higher, the better.

| Scan        | PSNR $\uparrow$ |               | SSIM $\uparrow$ |              | LPIPS $\downarrow$ |              |
|-------------|-----------------|---------------|-----------------|--------------|--------------------|--------------|
|             | VolSDF          | Ours          | VolSDF          | Ours         | VolSDF             | Ours         |
| 24          | 17.476          | <b>17.867</b> | 0.544           | <b>0.617</b> | <b>0.274</b>       | 0.285        |
| 37          | 10.783          | <b>15.372</b> | 0.554           | <b>0.615</b> | 0.310              | <b>0.271</b> |
| 40          | <b>14.489</b>   | 13.627        | <b>0.574</b>    | 0.496        | <b>0.286</b>       | 0.294        |
| 55          | 14.840          | <b>18.014</b> | 0.641           | <b>0.720</b> | 0.393              | <b>0.382</b> |
| 63          | 7.661           | <b>18.391</b> | 0.482           | <b>0.572</b> | 0.361              | <b>0.226</b> |
| 65          | 19.173          | <b>19.265</b> | 0.769           | <b>0.771</b> | 0.319              | <b>0.307</b> |
| 69          | <b>16.769</b>   | 16.268        | <b>0.720</b>    | 0.705        | 0.387              | <b>0.379</b> |
| 83          | <b>18.746</b>   | 17.119        | <b>0.866</b>    | 0.864        | <b>0.375</b>       | 0.391        |
| 97          | 18.321          | <b>18.821</b> | <b>0.827</b>    | <b>0.827</b> | 0.382              | <b>0.378</b> |
| 105         | <b>18.914</b>   | 18.165        | <b>0.873</b>    | 0.861        | 0.360              | <b>0.344</b> |
| 106         | <b>23.132</b>   | 23.103        | <b>0.845</b>    | 0.836        | <b>0.377</b>       | 0.407        |
| 110         | 21.763          | <b>25.954</b> | 0.843           | <b>0.900</b> | 0.437              | <b>0.436</b> |
| 114         | <b>24.510</b>   | 22.408        | <b>0.861</b>    | 0.834        | 0.372              | <b>0.352</b> |
| 118         | <b>28.324</b>   | 26.602        | <b>0.913</b>    | 0.905        | 0.397              | <b>0.368</b> |
| 122         | <b>25.488</b>   | 23.385        | <b>0.901</b>    | 0.836        | 0.400              | <b>0.372</b> |
| <b>Mean</b> | 18.693          | <b>19.624</b> | 0.748           | <b>0.757</b> | 0.362              | <b>0.346</b> |

Table 5: The results of different methods on the BlendedMVS dataset for each scan with few views (5-8) and without object masks.  $\uparrow$  means the higher, the better.

| Scan        | PSNR $\uparrow$ |               | SSIM $\uparrow$ |              | LPIPS $\downarrow$ |              |
|-------------|-----------------|---------------|-----------------|--------------|--------------------|--------------|
|             | VolSDF          | Ours          | VolSDF          | Ours         | VolSDF             | Ours         |
| 1           | 13.313          | <b>16.597</b> | 0.562           | <b>0.630</b> | 0.369              | <b>0.265</b> |
| 2           | 15.037          | <b>15.277</b> | 0.635           | <b>0.637</b> | 0.311              | <b>0.303</b> |
| 3           | <b>12.312</b>   | 10.965        | <b>0.556</b>    | 0.490        | <b>0.358</b>       | 0.398        |
| 4           | 14.132          | <b>14.614</b> | 0.722           | <b>0.735</b> | 0.278              | <b>0.254</b> |
| 5           | 13.781          | <b>14.358</b> | 0.675           | <b>0.699</b> | 0.299              | <b>0.268</b> |
| 6           | 11.662          | <b>12.114</b> | <b>0.579</b>    | 0.575        | 0.375              | <b>0.366</b> |
| 7           | 14.708          | <b>15.955</b> | 0.647           | <b>0.659</b> | 0.281              | <b>0.269</b> |
| 8           | <b>17.438</b>   | 16.384        | <b>0.760</b>    | 0.759        | <b>0.171</b>       | 0.178        |
| 9           | 12.876          | <b>13.491</b> | 0.478           | <b>0.487</b> | 0.415              | <b>0.386</b> |
| <b>Mean</b> | 13.918          | <b>14.417</b> | 0.624           | <b>0.630</b> | 0.317              | <b>0.299</b> |

Table 6: The results of different methods on the H3DS dataset for each scan with few views (5-8) and without object masks.  $\uparrow$  means the higher, the better.

| Scan        | PSNR $\uparrow$ |               | SSIM $\uparrow$ |              | LPIPS $\downarrow$ |              |
|-------------|-----------------|---------------|-----------------|--------------|--------------------|--------------|
|             | VolSDF          | Ours          | VolSDF          | Ours         | VolSDF             | Ours         |
| *a287       | 18.014          | <b>18.804</b> | 0.864           | <b>0.878</b> | 0.152              | <b>0.136</b> |
| *42a8       | 18.207          | <b>18.538</b> | <b>0.811</b>    | <b>0.811</b> | 0.202              | <b>0.195</b> |
| *1d54       | <b>22.271</b>   | 16.674        | <b>0.872</b>    | 0.761        | <b>0.139</b>       | 0.202        |
| *0854       | 18.837          | <b>19.950</b> | 0.809           | <b>0.827</b> | 0.187              | <b>0.171</b> |
| *0c89       | <b>20.037</b>   | 14.813        | <b>0.892</b>    | 0.779        | <b>0.129</b>       | 0.226        |
| *0226       | 20.999          | <b>21.706</b> | 0.863           | <b>0.869</b> | <b>0.132</b>       | 0.134        |
| *4baa       | 18.800          | <b>20.792</b> | 0.847           | <b>0.875</b> | 0.174              | <b>0.148</b> |
| *512f       | 19.587          | <b>19.780</b> | 0.829           | <b>0.832</b> | <b>0.190</b>       | 0.200        |
| *3924       | <b>19.950</b>   | 19.362        | <b>0.857</b>    | 0.851        | <b>0.155</b>       | 0.157        |
| *e5bc       | <b>22.159</b>   | 20.907        | <b>0.913</b>    | 0.900        | <b>0.113</b>       | 0.120        |
| *ee0b       | 15.451          | <b>16.959</b> | 0.817           | <b>0.841</b> | 0.209              | <b>0.187</b> |
| *e187       | 20.125          | <b>21.774</b> | 0.858           | <b>0.891</b> | 0.154              | <b>0.128</b> |
| *d436       | 16.528          | <b>17.806</b> | 0.780           | <b>0.794</b> | 0.211              | <b>0.193</b> |
| *b9c0       | 14.505          | <b>19.288</b> | 0.783           | <b>0.843</b> | 0.230              | <b>0.188</b> |
| *9c4e       | 19.285          | <b>20.137</b> | <b>0.894</b>    | <b>0.894</b> | <b>0.121</b>       | 0.123        |
| *7be3       | 19.439          | <b>20.038</b> | 0.825           | <b>0.864</b> | <b>0.151</b>       | <b>0.151</b> |
| *fd85       | <b>19.874</b>   | 19.391        | <b>0.858</b>    | 0.850        | <b>0.168</b>       | <b>0.168</b> |
| *c1e6       | 20.311          | <b>20.470</b> | 0.891           | <b>0.894</b> | 0.135              | <b>0.122</b> |
| *4b87       | <b>20.192</b>   | 19.527        | <b>0.890</b>    | 0.880        | 0.136              | <b>0.135</b> |
| *2a8f       | <b>17.871</b>   | 16.654        | <b>0.859</b>    | 0.831        | <b>0.173</b>       | 0.196        |
| *244e       | 18.218          | <b>18.508</b> | 0.797           | <b>0.825</b> | <b>0.179</b>       | 0.182        |
| *deb0       | <b>20.181</b>   | 19.616        | <b>0.865</b>    | <b>0.865</b> | <b>0.152</b>       | 0.171        |
| *2091       | 14.767          | <b>17.450</b> | 0.789           | <b>0.816</b> | 0.220              | <b>0.170</b> |
| <b>Mean</b> | 18.939          | <b>19.085</b> | 0.846           | <b>0.847</b> | 0.166              | <b>0.165</b> |

### 3.2 Setting with Fewer Views

In this section we attempt a challenge: only use three training views to train our CoCo-based network. Specifically, we select three representative views for each scan as training views (usually left, right, and top views), and the remaining views are used as test views to evaluate the performance of our method under extremely limited views. In this challenge, three training views mean that it is difficult for the network to learn background information, so we use masks to make the network more focus on the foreground. We conduct experiments on the DTU dataset and compare with mask-based VolSDF [6].

As shown in Table 7, our method has significantly improved over VolSDF with a higher mean PSNR, SSIM, and LPIPS respectively. Especially for the LPIPS, VolSDF is nearly 25% higher than our method, which means that the new view images generated by our method perform better at the semantic level. We visualize part of the experimental results in Fig. 2, and it can be seen that our CoCo-INR can still render satisfactory RGB images and surface features under the extremely limited 3 training views.

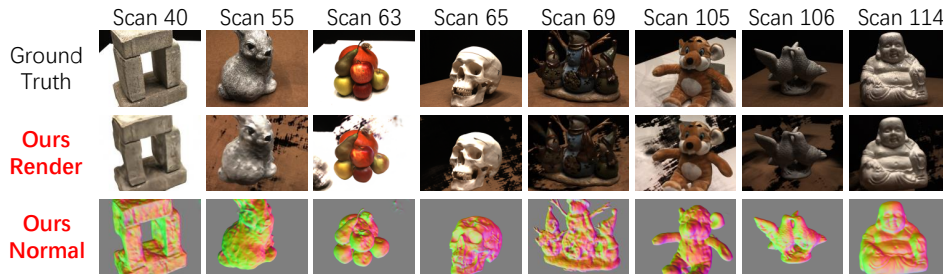

Figure 2: Qualitative visualization results (zoom-in for the best of views) on the DTU dataset with 3 extremely limited views.

Table 7: The results of different methods on the DTU dataset for each scene with 3 training views and objects masks.  $\uparrow$  means the higher, the better.

| Scan        | PSNR $\uparrow$ |               | SSIM $\uparrow$ |              | LPIPS $\downarrow$ |              |
|-------------|-----------------|---------------|-----------------|--------------|--------------------|--------------|
|             | VolSDF          | Ours          | VolSDF          | Ours         | VolSDF             | Ours         |
| 24          | <b>12.118</b>   | 11.266        | <b>0.518</b>    | 0.443        | 0.352              | <b>0.332</b> |
| 37          | 9.840           | <b>10.413</b> | <b>0.464</b>    | 0.387        | 0.337              | <b>0.334</b> |
| 40          | <b>10.743</b>   | 9.963         | <b>0.443</b>    | 0.372        | <b>0.309</b>       | 0.317        |
| 55          | 14.709          | <b>14.743</b> | <b>0.630</b>    | 0.619        | <b>0.401</b>       | 0.414        |
| 63          | <b>11.516</b>   | 11.179        | <b>0.428</b>    | 0.374        | 0.294              | <b>0.276</b> |
| 65          | 15.411          | <b>15.762</b> | 0.674           | <b>0.689</b> | 0.337              | <b>0.324</b> |
| 69          | <b>17.798</b>   | 17.472        | <b>0.771</b>    | 0.761        | <b>0.364</b>       | 0.375        |
| 83          | 10.316          | <b>10.681</b> | 0.675           | <b>0.715</b> | 0.430              | <b>0.405</b> |
| 97          | 11.936          | <b>12.302</b> | 0.707           | <b>0.714</b> | 0.419              | <b>0.412</b> |
| 105         | <b>11.296</b>   | 11.261        | 0.716           | <b>0.727</b> | 0.410              | <b>0.405</b> |
| 106         | 17.311          | <b>19.219</b> | 0.513           | <b>0.746</b> | 0.713              | <b>0.427</b> |
| 110         | <b>16.703</b>   | 16.367        | <b>0.497</b>    | <b>0.497</b> | 0.769              | <b>0.730</b> |
| 114         | 16.763          | <b>19.308</b> | 0.524           | <b>0.754</b> | 0.672              | <b>0.400</b> |
| 118         | 15.928          | <b>20.354</b> | 0.281           | <b>0.770</b> | 0.780              | <b>0.396</b> |
| 122         | 16.549          | <b>21.122</b> | 0.445           | <b>0.799</b> | 0.789              | <b>0.407</b> |
| <b>Mean</b> | 13.929          | <b>14.761</b> | 0.552           | <b>0.624</b> | 0.491              | <b>0.396</b> |

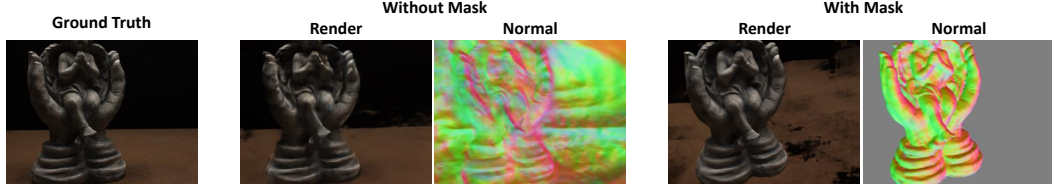

Figure 3: A failure case of our method with extremely limited views.

### 53 3.3 Limitations

54 For settings where the number of training views is extremely limited, it is possible that the limited  
55 views can not cover the entire background. So it is difficult to distinguish objects and background  
56 when they have similar color, as shown in Fig. 3. To improve the robustness of our method, for the  
57 setting of three training views, we have to use extra masks to reduce the background interference. In  
58 fact, we can fuse unsupervised methods and implicit neural representations to learn masks to reduce  
59 the manual annotation. Therefore, we will study self-supervised multi-task assisted CoCo-based  
60 methods to further improve the effectiveness under restricted conditions. Moreover, if we replace the  
61 per-scene learnable query embeddings in codebook attention modules with the image/pose-dependent  
62 feature tokens, our framework could be extended to a generalizable network across scenes rather than  
63 the current per-scene optimization.

## 64 References

- 65 [1] Rasmus Jensen, Anders Dahl, George Vogiatzis, Engin Tola, and Henrik Aanæs. Large scale multi-view  
66 stereopsis evaluation. In *Proceedings of the IEEE conference on computer vision and pattern recognition*,  
67 pages 406–413, 2014.
- 68 [2] Ben Mildenhall, Pratul P Srinivasan, Matthew Tancik, Jonathan T Barron, Ravi Ramamoorthi, and Ren Ng.  
69 Nerf: Representing scenes as neural radiance fields for view synthesis. In *European conference on computer*  
70 *vision*, pages 405–421. Springer, 2020.
- 71 [3] Michael Oechsle, Songyou Peng, and Andreas Geiger. Unisurf: Unifying neural implicit surfaces and  
72 radiance fields for multi-view reconstruction. In *Proceedings of the IEEE/CVF International Conference on*  
73 *Computer Vision*, pages 5589–5599, 2021.
- 74 [4] Eduard Ramon, Gil Triginer, Janna Escur, Albert Pumarola, Jaime Garcia, Xavier Giro-i Nieto, and Francesc  
75 Moreno-Noguer. H3d-net: Few-shot high-fidelity 3d head reconstruction. In *Proceedings of the IEEE/CVF*  
76 *International Conference on Computer Vision*, pages 5620–5629, 2021.
- 77 [5] Yao Yao, Zixin Luo, Shiwei Li, Jingyang Zhang, Yufan Ren, Lei Zhou, Tian Fang, and Long Quan.  
78 Blendedmvs: A large-scale dataset for generalized multi-view stereo networks. In *Proceedings of the*  
79 *IEEE/CVF Conference on Computer Vision and Pattern Recognition*, pages 1790–1799, 2020.
- 80 [6] Lior Yariv, Jiatao Gu, Yoni Kasten, and Yaron Lipman. Volume rendering of neural implicit surfaces.  
81 *Advances in Neural Information Processing Systems*, 34, 2021.
